# Supplementary material for: Facile synthesis of ZIF-8 nanocrystals in eutectic mixture
Source: Royal Society of Chemistry journal article supplement (doi:10.1039/c2ce26274f), 2012-01-01
Supplement: c2ce26274f.pdf [file c2ce26274f.pdf]

Supporting information for

**Facile synthesis of ZIF-8 nanocrystals in eutectic mixture**

**Cong Liu,<sup>a</sup> Fuxing Sun,<sup>\*a</sup> Shuyuan Zhou,<sup>a</sup> Yuyang Tian,<sup>a</sup> and Guangshan Zhu<sup>a</sup>**

*a State Key Laboratory of Inorganic Synthesis and Preparative Chemistry,  
Jilin University, Changchun, 130012, P. R. China. Fax: +86 431 85168331; Tel: 86 431 85168331;  
E-mail: fxsun@jlu.edu.cn.*

*Characterization of ZIF-8 nanoparticles*

The crystalline structures of ZIF-8 nanoparticles were determined by the X-ray diffraction (XRD) measurements using a Siemens D5005 diffractometer with Cu-K $\alpha$  radiation ( $\lambda=1.5418 \text{ \AA}$ ). The size and morphology of ZIF-8 nanoparticles were monitored by field-emission scanning electron microscope (FE-SEM: JEOS JSM 6700F).

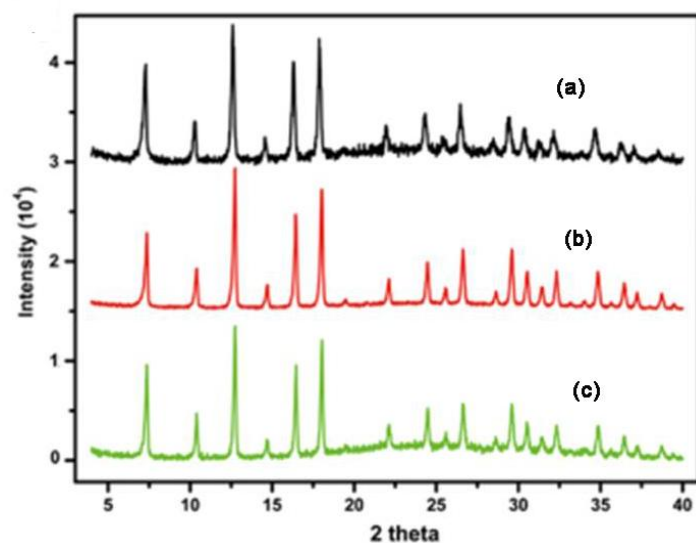

**Fig. S1** PXRD patterns of the as-synthesized ZIF-8 samples by different concentrations: 0.5 mol/L (a); 0.25 mol/L (b); 0.125 mol/L (c),

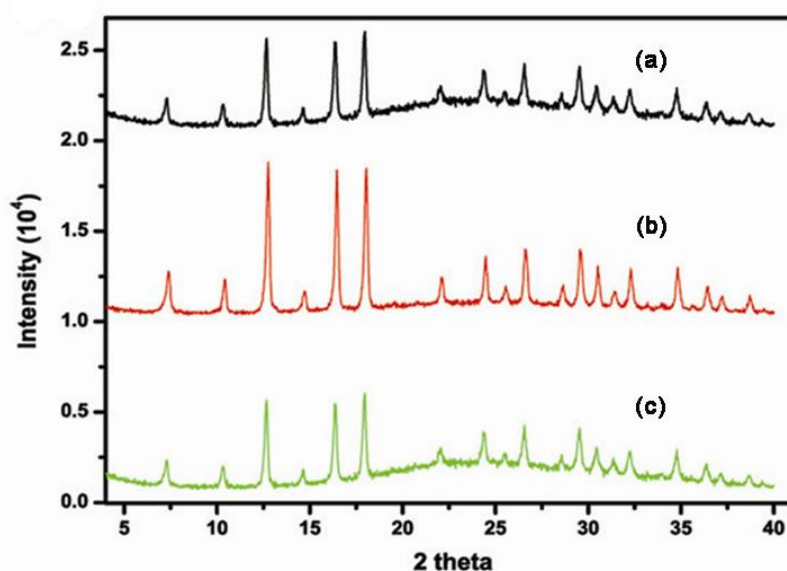

**Fig. S2** PXRD patterns of the as-synthesized ZIF-8 samples by different amounts of ethanol and water added to the solution (ratio to the solution): 1 and 4 (a); 2 and 8 (b); 4 and 1 (c)..

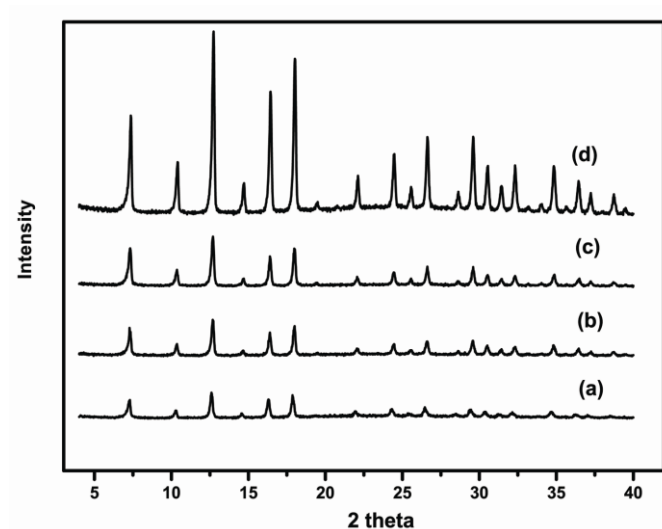

**Fig. S3** PXRD patterns of the as-synthesized ZIF-8 samples treated under 100 °C for different times: (a) 0.5 h; (b) 2 h; (c) 6 h; (d) 24 h.

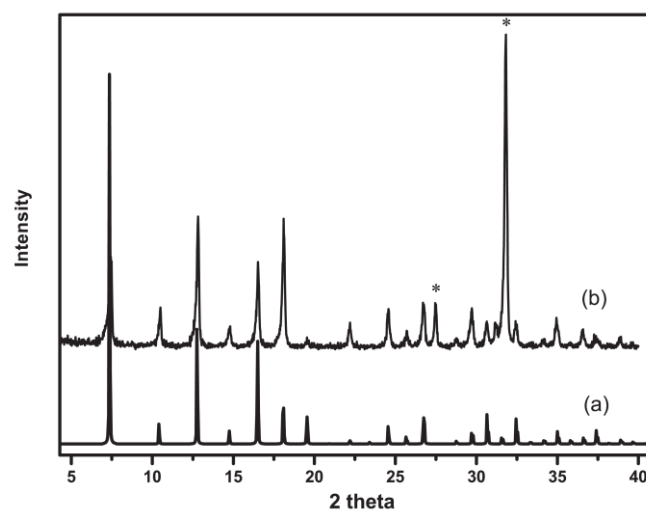

**Fig. S4** PXRD patterns of: (a) simulated from structure; (b) sample obtained after adding sodium hydroxide (asterisk: not coincident peaks)
